# Supplementary material
Source: PubMed Central journal article supplement (PMC7071963)
Supplement: NIHMS1550121-supplement-1.pdf [file NIHMS1550121-supplement-1.pdf]

## Recent Efforts to Dissect the Genetic Basis of Alcohol Use and Abuse

### *Supplemental Information*

#### **Note 1**

Genetic correlation and PRS analyses have shown that alcohol use has a shared genetic basis with many other complex traits; however, it is not clear if pleiotropy underlies these associations (i.e. same genes/biological processes influencing multiple traits) or whether there are causal relationships between alcohol use and health outcomes. Mendelian Randomization (MR, (1, 2)) can help to determine whether causal relationships exist by using genetic variants as instrumental variables. Because genetic variants are randomly “assigned” to the offspring during meiosis, they should be unrelated to confounding factors. As numerous variants have now been associated with alcohol use, they can be utilized as proxies for exposure to alcohol to probe causal relationships with various outcomes.

As reviewed in the main text, one striking observation from several independent GWAS has been that alcohol consumption is genetically correlated with *positive* health and lifestyle outcomes. This is supported by epidemiological studies showing that better health is associated with alcohol consumption at light to moderate intake levels, particularly for heart disease (3) and stroke (4). There is still debate as to whether these associations arise from unmeasured confounders and the misclassification of former drinkers (5), as there is also epidemiological evidence showing that even minimal alcohol drinking is detrimental for health (6). It is also unclear why AUD and alcohol consumption show different patterns of association with health outcomes, even at the genetic level. Epidemiologists have observed the 'alcohol harm paradox' whereby wealthier and more educated individuals consume alcohol more frequently whereas the burden of alcohol-related ill health is borne by individuals living in socially deprived regions (7). These patterns of alcohol use are likely to influence GWAS results. MR, along with sensitivity analyses in non-drinkers, will be an important tool to test the causal pathways underlying these observed correlations.

MR studies do not generally support the notion that alcohol consumption provides health benefits. For example, a MR analysis of vascular disease did not identify that genetic liability for alcohol use decreased risk for stroke or myocardial infarction (8), although the low rate of myocardial infarction in the Chinese biobank used in this study is a limitation of this analysis. In

addition, MR studies do not show that alcohol consumption provides educational advantage, contrary to the positive genetic association between educational attainment and alcohol consumption. In fact, Rosoff and colleagues recently showed that genetic liability for low educational attainment increased frequency of drinking, preference for various alcoholic beverages (beer, cider, and spirits), and risk for AUD (9).

MR has also been used to understand the positive genetic correlations between alcohol use behaviors and other substance use behaviors, such as smoking. To date, there is no compelling evidence for a causal effect of genetically instrumented alcohol consumption on smoking initiation (10, 11), which is in disagreement with previous observations suggesting that reduction of alcohol use could prevent smoking. There is also considerable co-morbidity between AUD and psychiatric disorders and evidence of shared genetic liability between these traits (12). For example, the significant co-morbidity between MDD and AD indicates a potential causal relationship, with a recent study suggesting that genetic liability for MDD increases risk for AD (13). In addition, although individuals with childhood ADHD showed increased risk for developing AD in an epidemiological study (14), a recent MR study did not find evidence that genetic liability for ADHD increased risk for alcohol consumption or AD (15). These important findings would not have been possible without the large GWAS studies of AUD and alcohol consumption, which discovered robustly associated genetic variants for use in MR analyses.

## **Note 2**

The lack of genetic studies in large non-European samples is a concern for many complex traits, but particularly pressing for studies of AUD. For example, rs671, which explains a large amount of variation in alcohol consumption in East Asian populations, is not polymorphic in Europeans. The ADH1B locus has also proven to be more complicated than previously believed as rs2066702, and not rs1229984, seems to be the main signal of association in AA. The majority of downstream PRS analyses to date have been performed on European individuals and we do not as yet know their applicability to non-European populations.

**Supplemental References**

1. Burgess S, Scott RA, Timpson NJ, Davey Smith G, Thompson SG, EPIC- InterAct Consortium (2015): Using published data in Mendelian randomization: a blueprint for efficient identification of causal risk factors. *Eur J Epidemiol.* 30: 543–552.
2. Davey Smith G, Hemani G (2014): Mendelian randomization: genetic anchors for causal inference in epidemiological studies. *Hum Mol Genet.* 23: R89-98.
3. Corrao G, Rubbiati L, Bagnardi V, Zambon A, Poikolainen K (2000): Alcohol and coronary heart disease: a meta-analysis. *Addict Abingdon Engl.* 95: 1505–1523.
4. Reynolds K, Lewis B, Nolen JDL, Kinney GL, Sathya B, He J, Lewis BL (2003): Alcohol consumption and risk of stroke: a meta-analysis. *JAMA.* 289: 579–588.
5. Emberson JR, Bennett DA (2006): Effect of alcohol on risk of coronary heart disease and stroke: causality, bias, or a bit of both? *Vasc Health Risk Manag.* 2: 239–249.
6. Griswold MG, Fullman N, Hawley C, Arian N, Zimsen SRM, Tymeson HD, *et al.* (2018): Alcohol use and burden for 195 countries and territories, 1990–2016: a systematic analysis for the Global Burden of Disease Study 2016. *The Lancet.* 392: 1015–1035.
7. Beard E, Brown J, West R, Angus C, Brennan A, Holmes J, *et al.* (2016): Deconstructing the Alcohol Harm Paradox: A Population Based Survey of Adults in England. *PloS One.* 11: e0160666.
8. Millwood IY, Walters RG, Mei XW, Guo Y, Yang L, Bian Z, *et al.* (2019): Conventional and genetic evidence on alcohol and vascular disease aetiology: a prospective study of 500 000 men and women in China. *Lancet Lond Engl.* . doi: 10.1016/S0140-6736(18)31772-0.
9. Rosoff DB, Lohoff F (2019): *Educational attainment causally impacts drinking behaviors and risk for alcohol dependence: results from a two-sample Mendelian randomization study in ~ 780,000 study participants.* preprint, *Epidemiology.* doi: 10.1101/557595.

10. Verweij KJH, Treur JL, Vink JM (2018): Investigating causal associations between use of nicotine, alcohol, caffeine and cannabis: a two-sample bidirectional Mendelian randomization study. *Addict Abingdon Engl.* 113: 1333–1338.
11. Taylor M, Rode L, Bjørngaard J, Taylor AE, Bojesen SE, Åsvold BO, *et al.* (2018): Is smoking heaviness causally associated with alcohol use? A Mendelian randomization study in four European cohorts. *Int J Epidemiol.* 47: 1098–1105.
12. Sanchez-Roige S, Palmer AA, Fontanillas P, Elson SL, 23andMe Research Team, the Substance Use Disorder Working Group of the Psychiatric Genomics Consortium, Adams MJ, *et al.* (2019): Genome-Wide Association Study Meta-Analysis of the Alcohol Use Disorders Identification Test (AUDIT) in Two Population-Based Cohorts. *Am J Psychiatry.* 176: 107–118.
13. Polimanti R, Peterson RE, Ong J-S, MacGregor S, Edwards AC, Clarke T-K, *et al.* (2019): Evidence of causal effect of major depression on alcohol dependence: findings from the psychiatric genomics consortium. *Psychol Med.* 1–9.
14. Lee SS, Humphreys KL, Flory K, Liu R, Glass K (2011): Prospective association of childhood attention-deficit/hyperactivity disorder (ADHD) and substance use and abuse/dependence: a meta-analytic review. *Clin Psychol Rev.* 31: 328–341.
15. Treur JL, Demontis D, Smith GD, Sallis H, ADHD working group of the Psychiatric Genomics Consortium, Richardson TG, *et al.* (2019): *Investigating causal pathways between liability to ADHD and substance use, and liability to substance use and ADHD risk, using Mendelian randomization.: Supplemental material.* preprint, Genetics. doi: 10.1101/524769.
